# Supplementary material for: Whole blood Fe isotopic signature in a sub-Saharan African population
Source: Royal Society of Chemistry journal article supplement (doi:10.1039/c7mt00170c), 2017-01-01
Supplement: c7mt00170c1.pdf [file c7mt00170c1.pdf]

## **Electronic Supplementary Information**

### **Whole blood Fe isotopic signature in a sub-Saharan African population**

Justin C. Cikomola<sup>1,2\*</sup>, María R. Flórez<sup>3\*</sup>, Marta Costas-Rodríguez<sup>3</sup>, Yulia Anoshkina<sup>3</sup>, Karl Vandepoele<sup>4</sup>, Philippe B. Katchunga<sup>1</sup>, Antoine S. Kishabongo<sup>5</sup>, Marijn M. Speeckaert<sup>6</sup>, Frank Vanhaecke<sup>3</sup> and Joris R. Delanghe<sup>2</sup>

*\* Both authors contributed equally to this paper.*

<sup>1</sup> Department of Internal Medicine, Hôpital provincial général de référence de Bukavu, Catholic University of Bukavu, Michombero 2, Bukavu, Democratic Republic of the Congo

<sup>2</sup> Department of Clinical Chemistry, Ghent University Hospital, De Pintelaan 185 B-9000 Ghent, Belgium

<sup>3</sup> Department of Analytical Chemistry, Ghent University, Campus Sterre, Krijgslaan 281-S12, B-9000 Ghent, Belgium.

<sup>4</sup> Laboratory of Molecular Diagnostics and Hematology, Ghent University Hospital, De Pintelaan 185, B-9000, Ghent, Belgium

<sup>5</sup> Department of Laboratory Medicine, Hôpital provincial général de référence de Bukavu, Catholic University of Bukavu, Michombero 2, Bukavu, Democratic Republic of the Congo

<sup>6</sup> Department of Nephrology, Ghent University Hospital, De Pintelaan 185, B-9000 Ghent, Belgium

**Table S1.** Relevant medical parameters and whole blood  $\delta^{56}\text{Fe}$  values (‰) for all samples included in the study. The uncertainty accompanying  $\delta^{56}\text{Fe}$  values represents the internal precision of the measurements expressed as two times the standard deviation (2SD) of all the measurement cycles.

| Sample code | Fpn Q248H    | Remark   | Fer ( $\mu\text{g L}^{-1}$ ) | Serum Fe ( $\mu\text{g dL}^{-1}$ ) | Tf ( $\text{g L}^{-1}$ ) | Tf SAT (%) | HbA1c ( $\text{mmol mol}^{-1}$ ) | BMI  | $\delta^{56}\text{Fe}$ (‰) | $\delta^{57}\text{Fe}$ (‰) |
|-------------|--------------|----------|------------------------------|------------------------------------|--------------------------|------------|----------------------------------|------|----------------------------|----------------------------|
| SK01        | Homozygote   | Diabetic | 86.99                        | 110.3                              | 2.40                     | 37.1       | 90                               | 22.3 | -2.80±0.07                 | -4.18±0.11                 |
| SK02        | Homozygote   | Diabetic | 121.2                        | 98.3                               | 2.61                     | 30.4       | 53                               | 21.8 | -2.84±0.03                 | -4.20±0.03                 |
| SK03        | Homozygote   | Diabetic | 1204                         | 91.1                               | 1.49                     | 49.3       | 45                               | 27.8 | -2.91±0.01                 | -4.28±0.02                 |
| SK04        | Homozygote   | Diabetic | 218.9                        | 55.5                               | 2.46                     | 18.2       | 42                               | 22.5 | -2.68±0.09                 | -3.92±0.15                 |
| SK05        | Heterozygote | Diabetic | 416.2                        | 89.6                               | 2.50                     | 28.9       | 85                               | 20.6 | -2.69±0.03                 | -3.94±0.06                 |
| SK06        | Heterozygote | Diabetic | 502.5                        | 116.9                              | 2.75                     | 34.3       | 51                               | 24.5 | -2.86±0.01                 | -4.18±0.01                 |
| SK07        | Heterozygote | Diabetic | 380.9                        | 165                                | 2.96                     | 45.0       |                                  | 27.7 | -2.97±0.01                 | -4.37±0.06                 |
| SK08        | Heterozygote | Diabetic | 449                          | 102.9                              | 2.53                     | 32.8       | 81                               | 23.9 | -2.94±0.04                 | -4.32±0.08                 |
| SK09        | Heterozygote | Diabetic | 71.06                        | 152.6                              | 3.00                     | 41.0       | 48                               |      | -2.73±0.05                 | -3.97±0.17                 |
| SK10        | Heterozygote |          | 551.2                        | 150.2                              | 2.44                     | 49.6       | 38                               | 25.6 | -3.21±0.07                 | -4.75±0.06                 |
| SK11        | Heterozygote |          | 120.5                        | 84.3                               | 2.52                     | 27.0       | 31                               | 23.4 | -2.89±0.05                 | -4.24±0.10                 |
| SK12        | Heterozygote |          | 162.4                        | 98.2                               | 2.11                     | 37.5       | 39                               | 22.5 | -2.82±0.01                 | -4.13±0.10                 |
| SK13        | Heterozygote |          | 202.6                        | 79.8                               | 2.00                     | 32.2       | 29                               | 23.7 | -2.67±0.01                 | -3.92±0.01                 |
| SK14        | Heterozygote |          | 169.6                        | 80                                 | 2.46                     | 26.2       | 33                               | 19.5 | -3.01±0.07                 | -4.45±0.07                 |
| SK15        | Heterozygote |          | 937.2                        | 124                                | 2.40                     | 41.7       | 38                               | 23.4 | -3.03±0.09                 | -4.53±0.02                 |
| SK16        | Heterozygote |          | 166.3                        | 102.8                              | 2.93                     | 28.3       | 32                               | 22.1 | -2.88±0.04                 | -4.26±0.07                 |
| SK17        | Wild-type    | Diabetic | 236.6                        | 95.5                               | 2.40                     | 32.1       | 51                               | 23.9 | -3.09±0.04                 | -4.57±0.14                 |
| SK18        | Wild-type    | Diabetic | 67.13                        | 85.9                               | 2.32                     | 29.9       | 46                               | 23.1 | -2.78±0.01                 | -4.10±0.01                 |
| SK19        | Wild-type    | Diabetic | 540.2                        | 75.6                               | 2.01                     | 30.3       | 81                               | 18.0 | -3.00±0.07                 | -4.33±0.15                 |
| SK20        | Wild-type    | Diabetic | 710.4                        | 74.5                               | 2.05                     | 29.3       | 62                               | 21.4 | -3.04±0.05                 | -4.48±0.02                 |
| SK21        | Wild-type    | Diabetic | 178.1                        | 73                                 | 2.36                     | 24.9       | 46                               | 20.3 | -2.95±0.06                 | -4.36±0.01                 |
| SK22        | Wild-type    | Diabetic | 703.5                        | 204.8                              | 2.83                     | 58.4       | 51                               | 26.8 | -3.03±0.06                 | -4.41±0.13                 |

|      |           |          |       |       |      |      |    |      |            |            |
|------|-----------|----------|-------|-------|------|------|----|------|------------|------------|
| SK23 | Wild-type | Diabetic | 176   | 95.1  | 2.59 | 29.6 | 39 | 20.3 | -2.47±0.05 | -3.64±0.08 |
| SK24 | Wild-type | Diabetic | 82.71 | 75.6  | 2.60 | 23.4 | 51 | 22.0 | -2.74±0.06 | -4.02±0.17 |
| SK25 | Wild-type | Diabetic | 141.3 | 81.2  | 2.06 | 31.8 | 81 | 18.7 | -2.41±0.04 | -3.56±0.02 |
| SK26 | Wild-type | Diabetic | 105.4 | 102.9 | 2.56 | 32.4 | 61 | 23.3 | -2.98±0.08 | -4.40±0.09 |
| SK27 | Wild-type |          | 750.8 | 107.3 | 2.64 | 32.8 | 32 | 24.9 | -3.32±0.04 | -4.91±0.04 |
| SK28 | Wild-type |          | 93.99 | 100.4 | 2.38 | 34.0 | 38 | 21.1 | -2.97±0.07 | -4.37±0.13 |
| SK29 | Wild-type |          | 273.8 | 86    | 2.94 | 23.6 | 35 | 33.8 | -3.17±0.02 | -4.70±0.03 |
| SK30 | Wild-type |          | 68.18 | 87.7  | 2.56 | 27.6 | 35 | 25.1 | -2.74±0.06 | -4.01±0.15 |
| SK31 | Wild-type |          | 78.38 | 115.3 | 2.93 | 31.7 | 39 | 18.0 | -2.69±0.03 | -3.97±0.21 |
| SK32 | Wild-type |          | 578   | 88.3  | 2.01 | 35.4 | 29 | 24.2 | -3.09±0.01 | -4.56±0.06 |
| SK33 | Wild-type |          | 299.6 | 205.2 | 3.10 | 53.4 | 24 | 27.7 | -2.83±0.09 | -4.15±0.22 |
| SK34 | Wild-type |          | 261.2 | 54    | 2.13 | 20.4 | 29 | 19.9 | -2.69±0.05 | -3.99±0.11 |
| SK35 | Wild-type |          | 337.2 | 76.6  | 2.38 | 26.0 | 27 | 21.3 | -2.94±0.01 | -4.29±0.06 |
| SK36 | Wild-type |          | 120.8 | 115.6 | 2.57 | 36.3 | 29 | 19.9 | -2.95±0.07 | -4.33±0.04 |
| SK37 | Wild-type |          | 219   | 98.8  | 2.94 | 27.1 | 31 | 22.6 | -3.03±0.01 | -4.48±0.06 |
| SK38 | Wild-type |          | 587   | 89.5  | 2.45 | 29.5 | 31 | 29.1 | -3.21±0.04 | -4.78±0.07 |
| SK39 | Wild-type |          | 477   | 65.3  | 2.26 | 23.3 | 32 | 28.7 | -3.10±0.01 | -4.60±0.06 |
| SK40 | Wild-type |          | 114.9 | 143.2 | 2.97 | 38.9 | 34 | 20.3 | -2.80±0.05 | -4.15±0.12 |
| SK41 | Wild-type |          | 1014  | 106.9 | 1.91 | 45.1 | 31 | 20.7 | -2.96±0.09 | -4.32±0.12 |
| SK42 | Wild-type |          | 214.9 | 107.3 | 2.18 | 39.7 | 31 | 23.6 | -3.08±0.04 | -4.56±0.10 |

---

**Table S2.** Instrument settings and data acquisition parameters for Fe quantification using a Thermo Scientific Element XR single collector sector field ICP-MS instrument.

|                                                |                                                                        |
|------------------------------------------------|------------------------------------------------------------------------|
| Instrument settings                            |                                                                        |
| RF power (W)                                   | 1250                                                                   |
| Guard electrode                                | Connected                                                              |
| Sampler cone                                   | Ni; Standard; 1.1 mm aperture diameter                                 |
| Skimmer cone                                   | Ni; H-type; 0.8 mm aperture diameter                                   |
| Lens settings                                  | Optimized for maximum analyte signal intensity                         |
| Plasma gas flow rate (L min <sup>-1</sup> )    | 15                                                                     |
| Auxiliary gas flow rate (L min <sup>-1</sup> ) | 0.80                                                                   |
| Nebulizer gas flow rate (L min <sup>-1</sup> ) | 1.010                                                                  |
| Sample uptake rate (μL min <sup>-1</sup> )     | 200                                                                    |
| Resolution                                     | Medium (4000)                                                          |
| Data acquisition parameters                    |                                                                        |
| Scan mode                                      | E-Scan                                                                 |
| Segment duration (s)                           | 0.2                                                                    |
| Sample time (s)                                | 0.01                                                                   |
| Runs                                           | 5                                                                      |
| Passes                                         | 5                                                                      |
| Samples per peak                               | 20                                                                     |
| Nuclides monitored                             | <sup>54</sup> Fe, <sup>56</sup> Fe; <sup>57</sup> Fe; <sup>69</sup> Ga |
